# Supplementary material
Source: publisher figshare collection journal article supplement (https://diabetesjournals.figshare.com/ndownloader/files/28166241)
Supplement: Supplementary file 1 [file 28166241]

## Online-Only Supplementary Materials

### Table of Contents

Supplementary Table 1. Attrition table

Supplementary Table 2. Frequency of testing by increasing time period across organizations and clinical practice sites.

Supplementary Figure 1. Analysis Description

Supplementary Figure 2. Prevalence of detected elevated albuminuria ( $\geq 30$  mg/g) and uACR testing rates, among all patients without an ACE-I or ARB and among patients who also have uACR tested.

Supplementary Figure 3. Prevalence of detected elevated albuminuria ( $\geq 30$  mg/g) and uACR testing rates, among all patients with an ACE-I or ARB and among patients who also have uACR tested.

Supplementary Figure 4. Risk classification of CKD by ACE-I/ARB prescribing, among patients with and without diagnosed CKD

Supplementary Figure 5: Patient characteristics associated with testing in the past year for both eGFR and uACR and uACR only

Supplementary Figure 6: Organization characteristics associated with testing in the past year of eGFR and uACR and uACR only

Supplementary Figure 7: Distribution of adjustments by healthcare organization for eGFR and uACR and uACR models

Supplementary Table 1. Attrition table

|                                                                                                                               | N                |
|-------------------------------------------------------------------------------------------------------------------------------|------------------|
| <b>Total number of patients aged 18-85 with <math>\geq 1</math> outpatient visit for evaluation and management with a PCP</b> | <b>3,976,210</b> |
| <b>Patients with Type 2 Diabetes Mellitus</b>                                                                                 | <b>543,041</b>   |
| end stage kidney disease or stage 5 CKD (excluded)                                                                            | <i>13,351</i>    |
| hospice care (excluded)                                                                                                       | <i>5,591</i>     |
| pregnant (excluded)                                                                                                           | <i>1,854</i>     |
| attributed to a clinical practice site with fewer than 30 patients (excluded)                                                 | <i>9,080</i>     |
| <b>Study Population</b>                                                                                                       | <b>513,165</b>   |

Supplementary Table 2. Frequency of testing by increasing time period across organizations and clinical practice sites.

| Number of tests in time period: mean (s.d) | Organizations (n=24), median [10th – 90th percentile] | Clinical practice sites (n=1,164), median [10 <sup>th</sup> – 90 <sup>th</sup> percentile] |
|--------------------------------------------|-------------------------------------------------------|--------------------------------------------------------------------------------------------|
| eGFR                                       |                                                       |                                                                                            |
| 1 year                                     | 2.10 (2.10) [1.80 (1.41) – 2.43 (2.70)]               | 2.09 (1.90) [1.31 (1.20) – 2.85 (3.05)]                                                    |
| 2 years                                    | 4.49 (4.97) [3.72 (2.46) – 5.47 (6.53)]               | 4.54 (4.49) [2.79 (2.33) – 6.30 (7.17)]                                                    |
| 3 years                                    | 6.32 (6.61) [5.34 (3.47) – 8.07 (9.52)]               | 6.63 (6.20) [3.80 (3.20) – 9.30 (10.04)]                                                   |
| uACR                                       |                                                       |                                                                                            |
| 1 year                                     | 0.64 (0.68) [0.51 (0.58) – 0.83 (0.89)]               | 0.63 (0.58) [0.15 (0.40) – 0.93 (0.81)]                                                    |
| 2 years                                    | 1.18 (1.05) [0.91 (0.89) – 1.54 (1.49)]               | 1.17 (0.85) [0.30 (0.58) – 1.71 (1.28)]                                                    |
| 3 years                                    | 1.62 (1.42) [1.19 (1.17) – 2.12 (2.05)]               | 1.61 (1.12) [0.39 (0.69) – 2.42 (1.74)]                                                    |
| uA                                         |                                                       |                                                                                            |
| 1 year                                     | 0.68 (0.67) [0.50 (0.59) – 0.89 (0.89)]               | 0.67 (0.59) [0.24 (0.45) – 0.94 (0.81)]                                                    |
| 2 years                                    | 1.22 (1.05) [0.91 (0.91) – 1.66 (1.48)]               | 1.25 (0.87) [0.45 (0.63) – 1.75 (1.30)]                                                    |
| 3 years                                    | 1.70 (1.41) [1.16 (1.17) – 2.33 (2.05)]               | 1.73 (1.16) [0.52 (0.75) – 2.48 (1.77)]                                                    |
| urine dipstick                             |                                                       |                                                                                            |
| 1 year                                     | 0.53 (1.04) [0.36 (0.84) – 0.72 (1.18)]               | 0.01 (0.13) [0.00 (0.00) – 0.07 (0.37)]                                                    |
| 2 years                                    | 1.01 (1.69) [0.65 (1.40) – 1.35 (1.92)]               | 0.03 (0.21) [0.00 (0.00) – 0.12 (0.61)]                                                    |
| 3 years                                    | 1.39 (2.22) [0.90 (1.85) – 1.97 (2.63)]               | 0.03 (0.26) [0.00 (0.00) – 0.15 (0.80)]                                                    |
| uPCR                                       |                                                       |                                                                                            |
| 1 year                                     | 0.02 (0.19) [0.00 (0.03) – 0.05 (0.31)]               | 1.83 (1.01) [1.19 (0.84) – 2.24 (1.2)]                                                     |
| 2 years                                    | 0.03 (0.32) [0.00 (0.04) – 0.08 (0.52)]               | 3.42 (1.70) [2.13 (1.38) – 4.23 (2.11)]                                                    |
| 3 years                                    | 0.05 (0.41) [0.00 (0.06) – 0.11 (0.69)]               | 4.77 (2.43) [2.64 (1.85) – 6.03 (3.03)]                                                    |

Supplementary Figure 1: Analysis Description

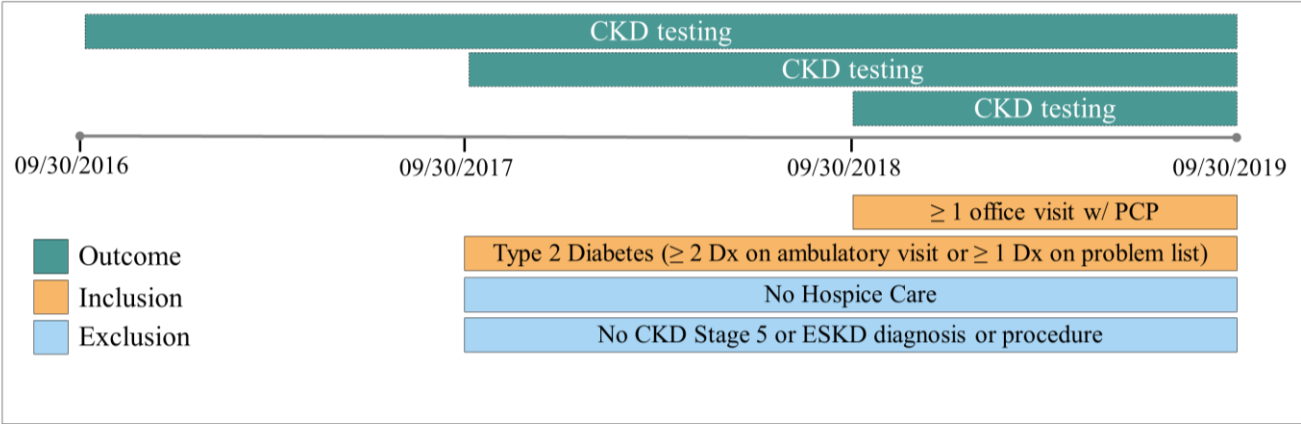

Supplementary Figure 2: Prevalence of detected elevated albuminuria ( $\geq 30$  mg/g) and uACR testing rates, among all patients without an ACE-I or ARB and among patients who also have uACR tested.

**A) All Patients, by Organization**

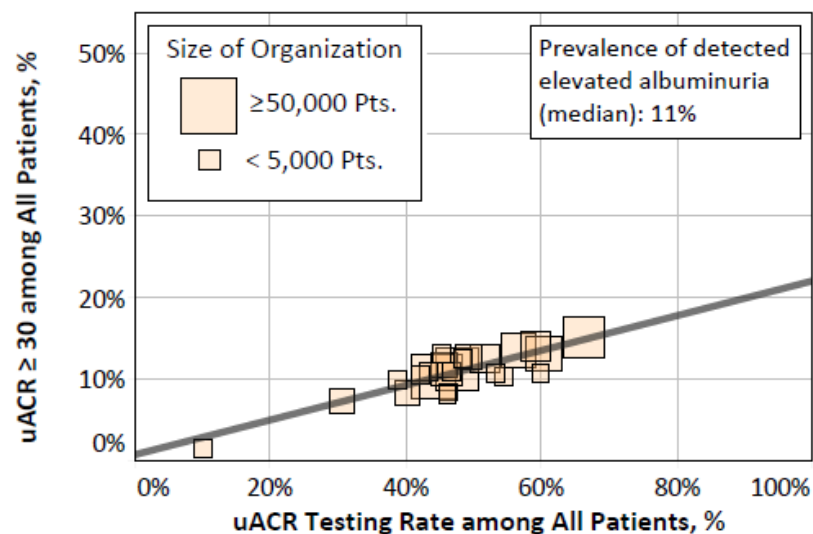

**B) All Patients, by Clinical Practice Site**

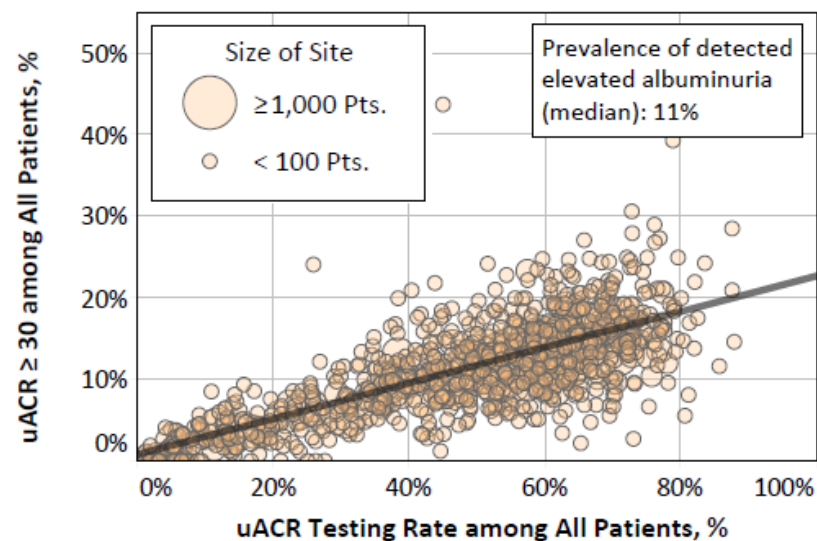

**C) Patients with uACR Tested, by Organization**

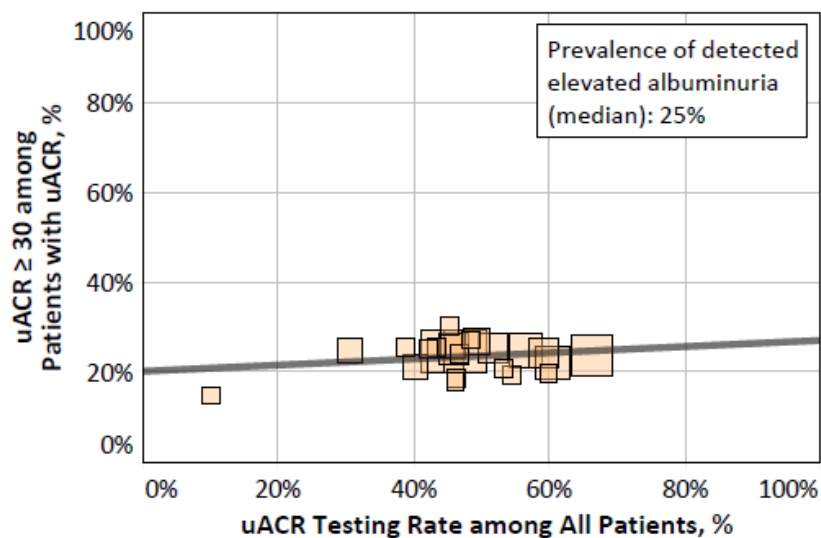

**D) Patients with uACR Tested, by Clinical Practice Site**

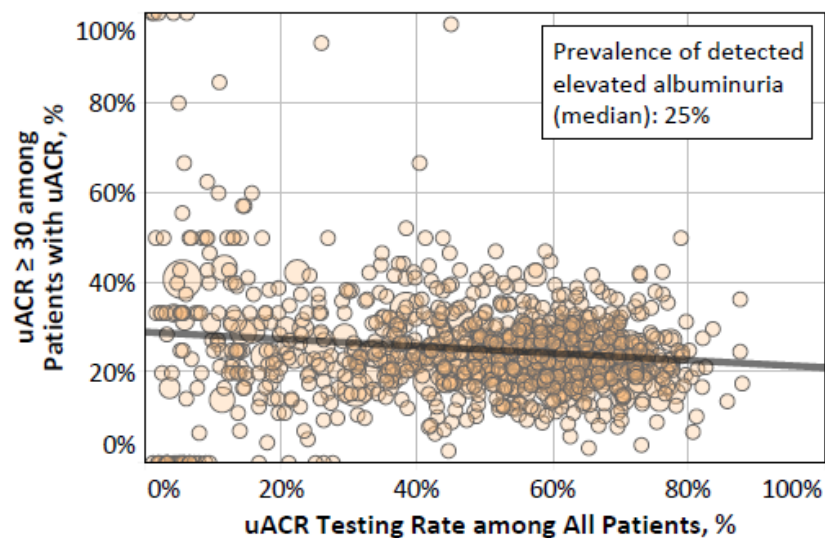

Supplementary Figure 3: Prevalence of detected elevated albuminuria ( $\geq 30$  mg/g) and uACR testing rates, among all patients with an ACE-I or ARB and among patients who also have uACR tested.

**A) All Patients, by Organization**

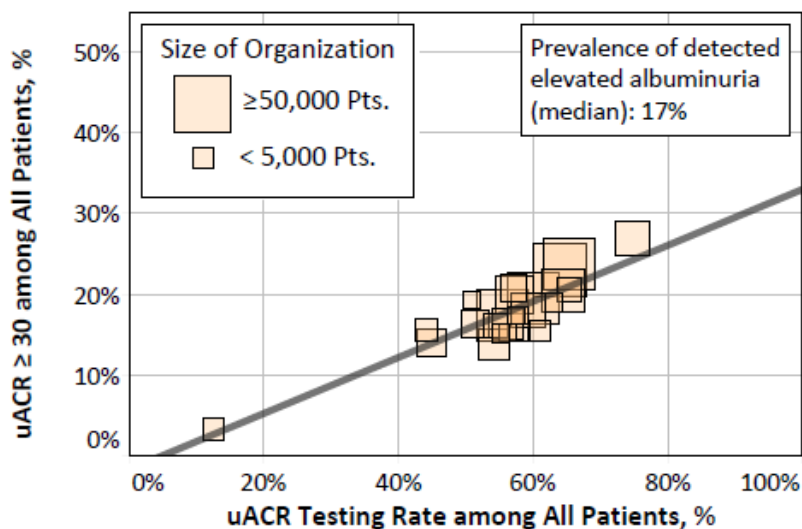

**B) All Patients, by Clinical Practice Site**

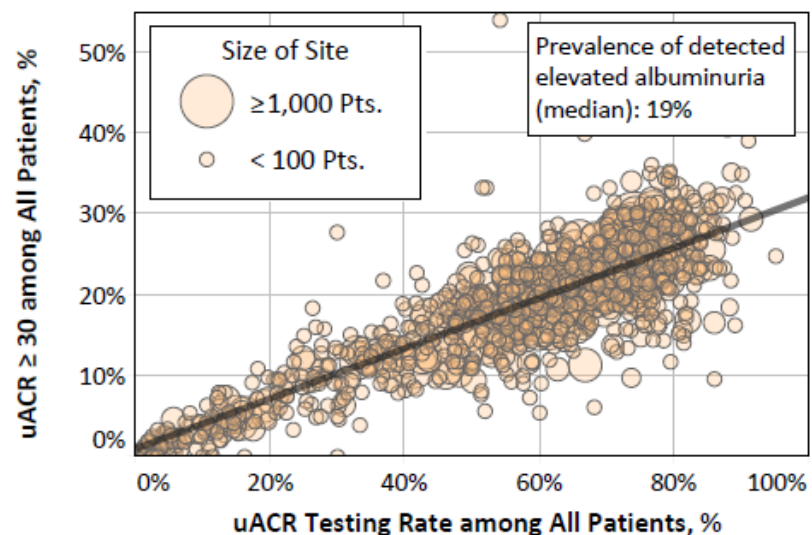

**C) Patients with uACR Tested, by Organization**

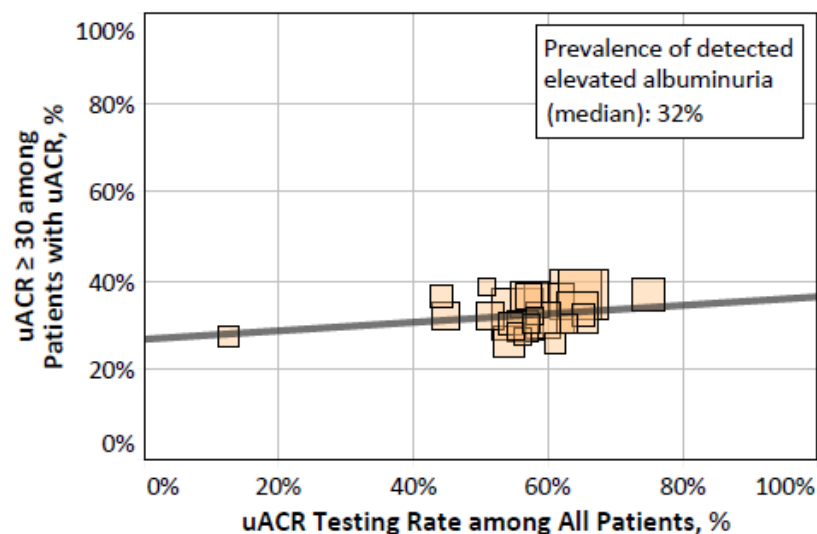

**D) Patients with uACR Tested, by Clinical Practice Site**

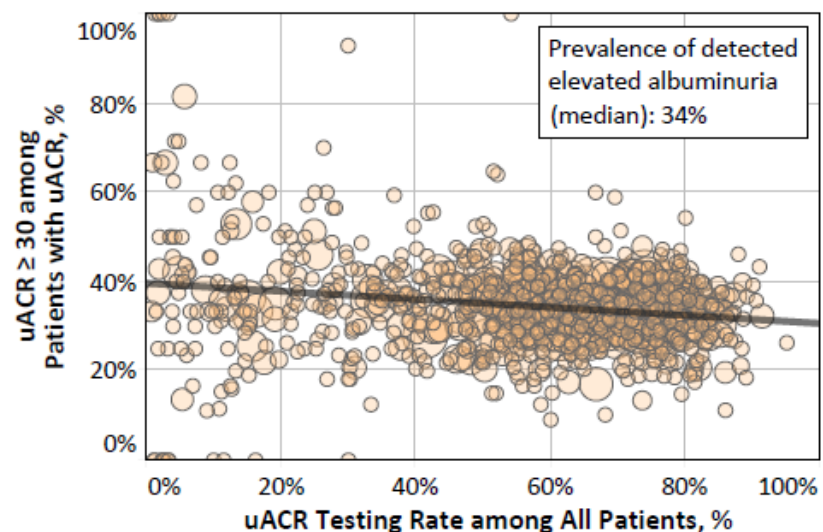

Supplementary Figure 4: Risk classification of CKD by ACE-I/ARB prescribing, among patients with (A) and without (B) diagnosed CKD

**A**

ACE-I or ARB (n=57,423)

| eGFR Category<br>(ml/min/1.73m <sup>2</sup> ) | uACR Categories (mg/g) |            |           |        |
|-----------------------------------------------|------------------------|------------|-----------|--------|
|                                               | A1: <30                | A2: 30-300 | A3: ≥ 300 | Total  |
| G1: ≥ 90                                      | 5.6%                   | 6.9%       | 1.8%      | 14.2%  |
| G2: 60-89                                     | 16.7%                  | 13.7%      | 3.9%      | 34.3%  |
| G3a: 45-59                                    | 15.2%                  | 9.7%       | 3.5%      | 28.4%  |
| G3b: 30-44                                    | 8.2%                   | 7.1%       | 3.6%      | 18.9%  |
| G4: 15-29                                     | 1.1%                   | 1.5%       | 1.6%      | 4.2%   |
| Total                                         | 46.7%                  | 38.8%      | 14.4%     | 100.0% |

|                   |       |
|-------------------|-------|
| No CKD            | 22.2% |
| Intermediate risk | 35.7% |
| High risk         | 23.6% |
| Very high risk    | 18.3% |

No ACE-I or ARB (n=18,736)

| eGFR Category<br>(ml/min/1.73m <sup>2</sup> ) | uACR Categories (mg/g) |            |           |        |
|-----------------------------------------------|------------------------|------------|-----------|--------|
|                                               | A1: <30                | A2: 30-300 | A3: ≥ 300 | Total  |
| G1: ≥ 90                                      | 5.7%                   | 4.4%       | 1.0%      | 11.1%  |
| G2: 60-89                                     | 18.0%                  | 10.3%      | 2.1%      | 30.4%  |
| G3a: 45-59                                    | 16.1%                  | 9.1%       | 2.8%      | 28.1%  |
| G3b: 30-44                                    | 9.7%                   | 8.4%       | 3.5%      | 21.7%  |
| G4: 15-29                                     | 2.0%                   | 3.2%       | 3.5%      | 8.8%   |
| Total                                         | 51.6%                  | 35.4%      | 13.0%     | 100.0% |

|                   |       |
|-------------------|-------|
| No CKD            | 23.7% |
| Intermediate risk | 30.8% |
| High risk         | 22.0% |
| Very high risk    | 23.6% |

**B**

ACE-I or ARB (n=130,744)

| eGFR Category<br>(ml/min/1.73m <sup>2</sup> ) | uACR Categories (mg/g) |            |           |        |
|-----------------------------------------------|------------------------|------------|-----------|--------|
|                                               | A1: <30                | A2: 30-300 | A3: ≥ 300 | Total  |
| G1: ≥ 90                                      | 28.1%                  | 8.3%       | 1.1%      | 37.5%  |
| G2: 60-89                                     | 39.0%                  | 10.7%      | 1.6%      | 51.3%  |
| G3a: 45-59                                    | 6.5%                   | 2.4%       | 0.5%      | 9.4%   |
| G3b: 30-44                                    | 1.0%                   | 0.5%       | 0.2%      | 1.7%   |
| G4: 15-29                                     | 0.0%                   | 0.0%       | 0.0%      | 0.1%   |
| Total                                         | 74.7%                  | 21.9%      | 3.4%      | 100.0% |

|                   |       |
|-------------------|-------|
| No CKD            | 67.1% |
| Intermediate risk | 25.5% |
| High risk         | 6.1%  |
| Very high risk    | 1.3%  |

No ACE-I or ARB (n=71,406)

| eGFR Category<br>(ml/min/1.73m <sup>2</sup> ) | uACR Categories (mg/g) |            |           |        |
|-----------------------------------------------|------------------------|------------|-----------|--------|
|                                               | A1: <30                | A2: 30-300 | A3: ≥ 300 | Total  |
| G1: ≥ 90                                      | 36.9%                  | 6.9%       | 0.7%      | 44.5%  |
| G2: 60-89                                     | 39.7%                  | 7.0%       | 0.7%      | 47.4%  |
| G3a: 45-59                                    | 5.1%                   | 1.5%       | 0.3%      | 6.9%   |
| G3b: 30-44                                    | 0.7%                   | 0.4%       | 0.1%      | 1.2%   |
| G4: 15-29                                     | 0.0%                   | 0.0%       | 0.0%      | 0.1%   |
| Total                                         | 82.4%                  | 15.9%      | 1.7%      | 100.0% |

|                   |       |
|-------------------|-------|
| No CKD            | 76.6% |
| Intermediate risk | 19.0% |
| High risk         | 3.5%  |
| Very high risk    | 0.9%  |

Patients without eGFR or uACR in the past year were excluded. ACE-I and ARB prescribing ascertained in the past year. CKD diagnoses ascertained from outbound claims in the past 2 years using the 9<sup>th</sup> and 10<sup>th</sup> revisions of international classification of diseases (ICD). CKD risk categories: no CKD, eGFR ≥ 60 (mL/min/1.73m<sup>2</sup>) and uACR < 30 (mg/g); moderate risk, eGFR 45 – 59 and uACR < 30, eGFR ≥ 60 and uACR 30 – 299; high risk, eGFR 30 – 44 and uACR < 30, eGFR 45 – 59 and uACR 30 – 299, eGFR ≥ 60 and uACR ≥ 300; very high risk, eGFR < 30 and uACR < 30, eGFR < 45 and uACR 30-299, eGFR < 60 and uACR ≥ 300.

Supplementary Figure 5: Patient characteristics associated with testing in the past year for both eGFR and uACR (A) and uACR only (B)

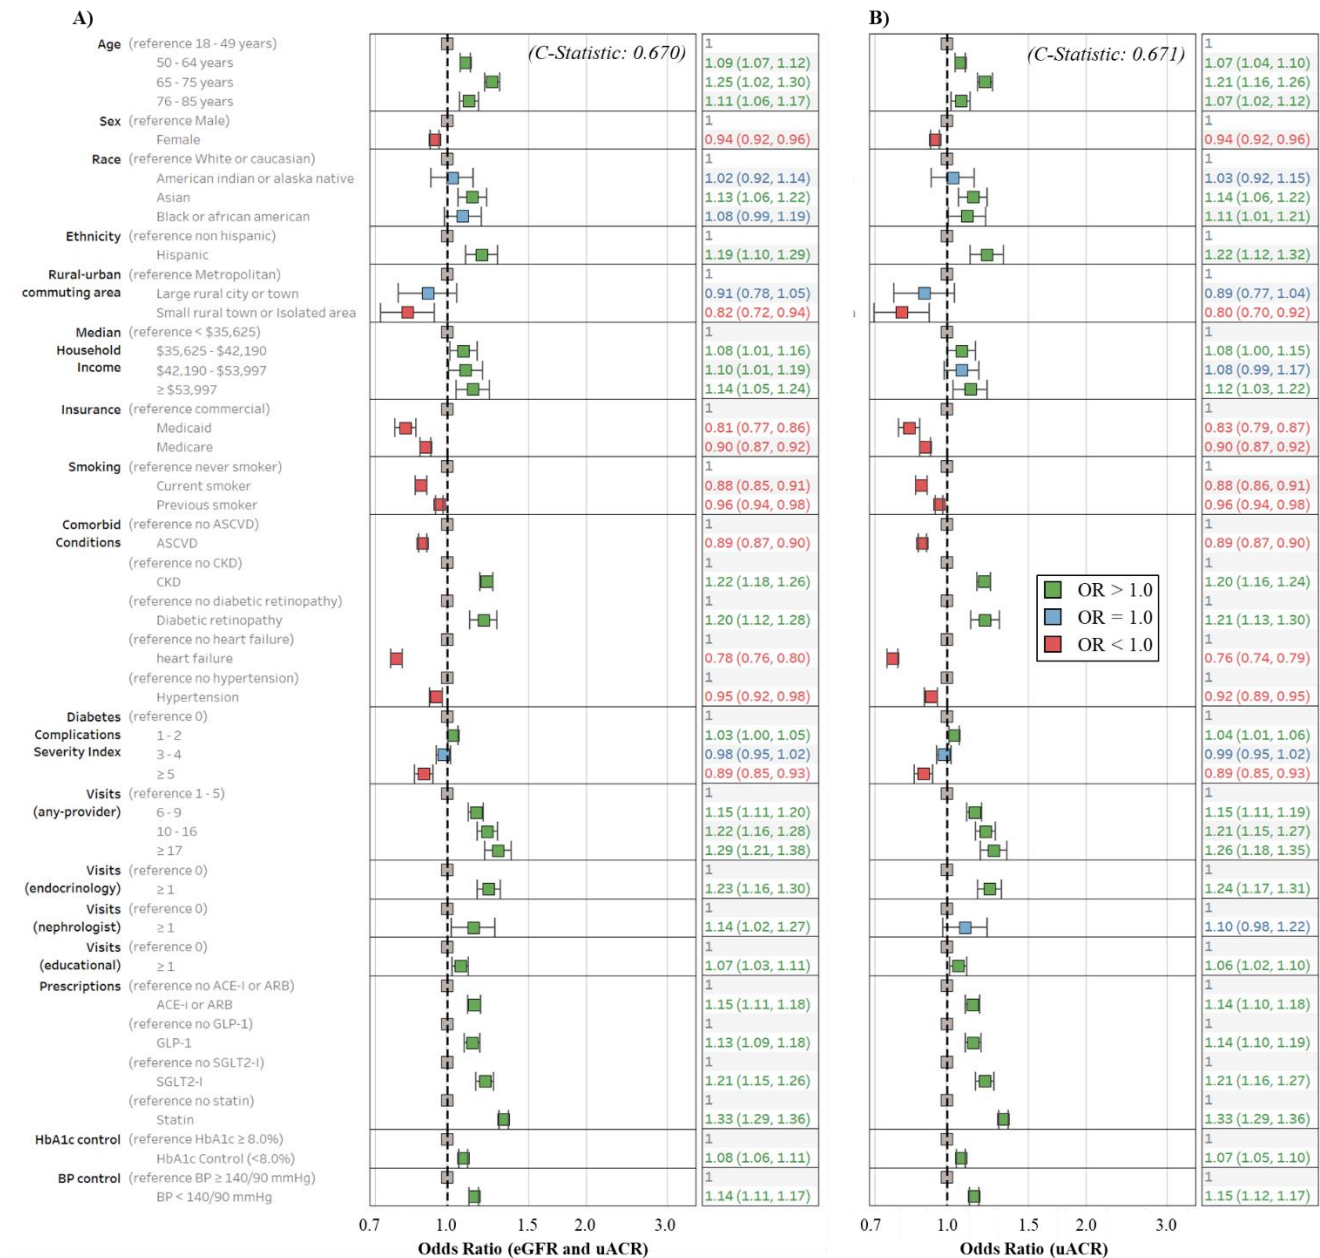

Odds ratios (OR) were calculated using logistic regression, adjusted for healthcare organization, and using robust standard errors clustered by clinical practice site (error bars show 95% confidence intervals). Odds ratio > 1.0 indicate increased odds of testing. For HbA1c control, odds ratio (OR) for no HbA1c measurement were OR<sub>eGFR + uACR</sub> 0.03 (0.03, 0.04); OR<sub>uACR</sub> 0.04 (0.04, 0.05). Abbreviations: ASCVD, atherosclerotic cardiovascular disease; CKD, chronic kidney disease; GLP-1 RA, glucagon-like peptide 1 receptor agonists; SGLT2 inhibitor, sodium-glucose cotransporter-2; ACE-I, angiotensin-converting enzyme inhibitors; ARB, angiotensin receptor blocker.

Supplementary Figure 6: Organization characteristics associated with testing in the past year of eGFR and uACR (A) and uACR only (B)

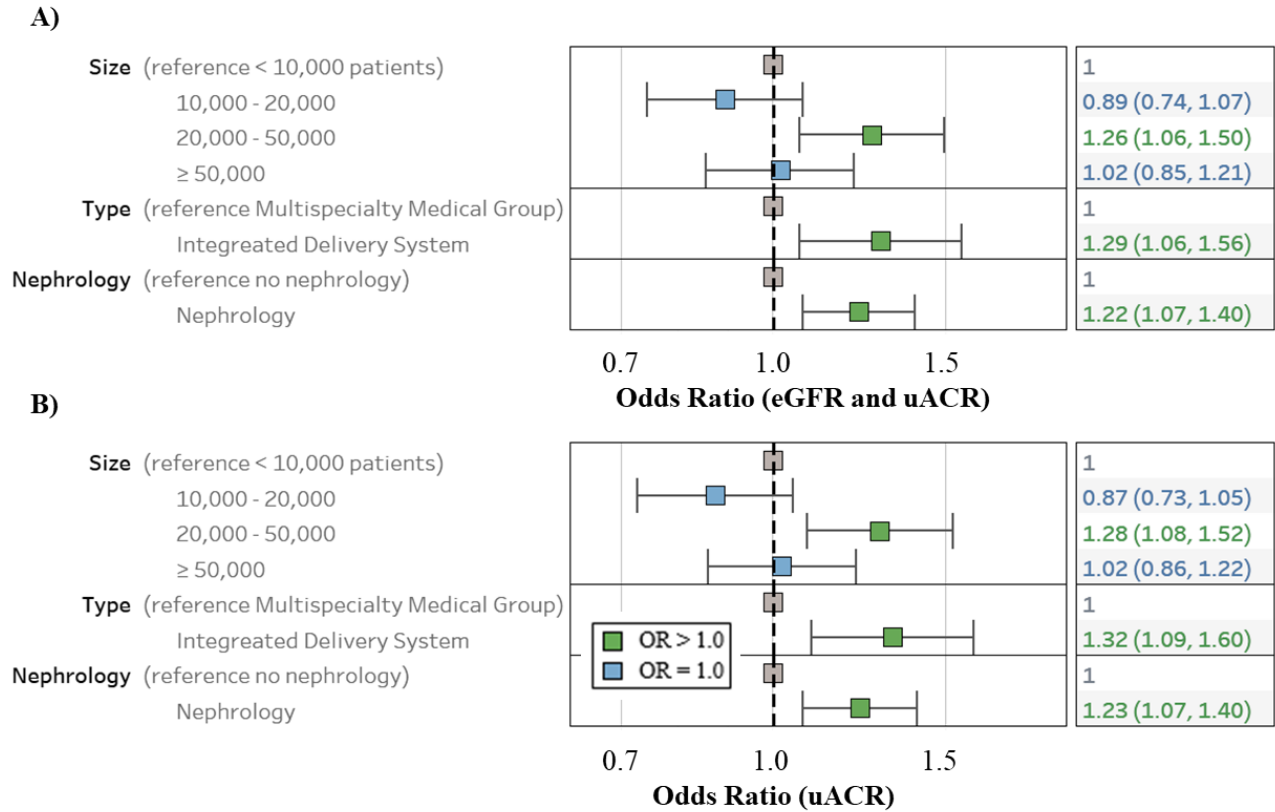

Odds ratios were calculated using logistic regression with robust standard errors clustered by clinical practice site (error bars show 95% confidence intervals). Adjusted for age, sex, race, ethnicity, insurance, rural urban commuting area, median household income, smoking, comorbid conditions (atherosclerotic cardiovascular disease, chronic kidney disease, diabetic retinopathy, heart failure, hypertension) diabetes complication severity index, utilization (visits with any provider, with nephrologists, with endocrinologist, and for education), medications prescribed (angiotensin-converting enzyme inhibitors or angiotensin receptor blockers, glucagon-like peptide 1 receptor agonists, sodium-glucose cotransporter-2 inhibitors, statins), hemoglobin A1c control (< 8.0%), and blood pressure control (< 140/90 mmHg). Odds ratio > 1.0 indicate increased odds of testing.

Supplementary Figure 7: Distribution of adjustments by healthcare organization for eGFR and uACR (A) and uACR (B) models

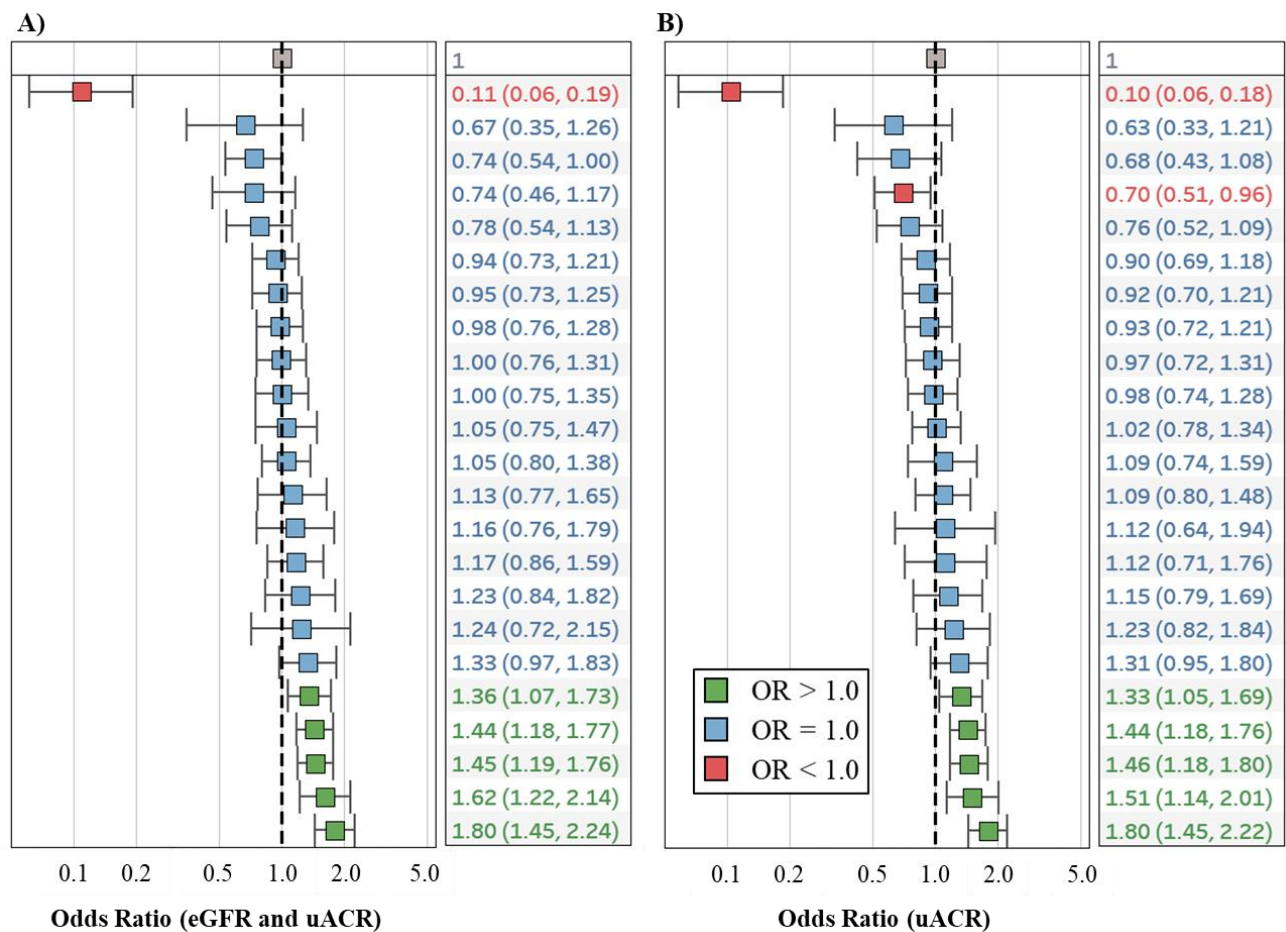

Odds ratios were calculated using logistic regression with robust standard errors clustered by clinical practice site (error bars show 95% confidence intervals). Adjusted for age, sex, race, ethnicity, insurance, rural urban commuting area, median household income, smoking, comorbid conditions (ASCVD, CKD, diabetic retinopathy, heart failure, hypertension) diabetes complication severity index, utilization (visits with any provider, with nephrologists, with endocrinologist, and for education), medications prescribed (ACE-I/ARB, GLP-1 RA, SGLT2 inhibitor, statin), HbA1c control (< 8.0%), and BP control (< 140/90 mmHg). Odds ratio > 1.0 indicate increased odds of testing.
